# Supplementary material
Source: publisher site journal article supplement (https://www.spandidos-publications.com/4651/downloadSupplementary)
Supplement: Supplementary file 1 [file downloadSupplementary]

## Sheet: Sheet1
Table SIV. Detailed information of the top 20 differentially expressed circRNAs between PZH-treated and CCl4-induced fibrotic liver samples in a mouse model.
circRNA ID	circRNA name	Gene ID	log2 fold-change (case/control)	P-value	False discovery rate	Regulation	Significant	Mean case	Mean control	count_Case_1	count_Case_2	count_Case_3	count_Case_4	count_Case_5	count_Case_6	count_Control_1	count_Control_2	count_Control_3	count_Control_4	count_Control_5	count_Control_6	fpkm_Case_1	fpkm_Case_2	fpkm_Case_3	fpkm_Case_4	fpkm_Case_5	fpkm_Case_6	fpkm_Control_1	fpkm_Control_2	fpkm_Control_3	fpkm_Control_4	fpkm_Control_5	fpkm_Control_6
2:23087485|23094517	2:23087484|23094517	Acbd5	2.51891	4.36e-09	4.01e-05	up	yes	0.47315	0	26	72	36	14	26	22	0	0	0	0	0	0	4.64745	11.4639	6.16642	2.19683	4.00268	3.75609	0	0	0	0	0	0
9:69999094|70004341	9:69999093|70004341	Bnip2	2.66915	3.41e-07	0.00156748	up	yes	0.536056	0	28	30	44	78	0	36	0	0	0	0	0	0	5.15289	4.92985	7.76887	12.6725	0	6.79911	0	0	0	0	0	0
mmu-circRNA1150	12:69640053|69658078	Sos2	1.75716	3.06e-05	0.0701358	up	yes	0.238033	0	16	24	14	12	12	20	0	0	0	0	0	0	2.75468	3.93486	2.2907	2.0617	1.90542	3.52336	0	0	0	0	0	0
18:38251086|38251400	18:38251085|38251400	0610009O20Rik	1.98136	5.29e-05	0.0825189	up	yes	0.294866	0	26	40	0	20	24	18	0	0	0	0	0	0	4.59752	6.22405	0	3.11907	3.80818	3.04218	0	0	0	0	0	0
6:88352446|88358642	6:88352445|88358642	Eefsec	2.82879	5.39e-05	0.0825189	up	yes	0.610478	0	88	0	120	0	66	0	0	0	0	0	0	0	15.2108	0	19.5654	0	10.9513	0	0	0	0	0	0	0
3:84527686|84548035	3:84527685|84548035	Arfip1	1.78162	0.000366884	0.481299	up	yes	0.243811	0	18	34	18	0	20	10	0	0	0	0	0	0	3.47415	5.18725	3.07683	0	3.58968	1.69841	0	0	0	0	0	0
mmu-circRNA1232	14:70678078|70682850	Xpo7	2.50136	0.00088913	0.907208	up	yes	0.466221	0	110	0	0	0	120	0	0	0	0	0	0	0	19.1817	0	0	0	18.5753	0	0	0	0	0	0	0
5:22128615|22227660	5:22128614|22227660	Reln	1.587	0.00131872	1	up	yes	0.200424	0	12	20	24	0	12	12	0	0	0	0	0	0	2.33216	3.57653	3.91631	0	1.84595	2.12246	0	0	0	0	0	0
5:134664185|134665293	5:134664184|134665293	Limk1	1.51496	0.00155927	1	up	yes	0.185791	0	20	16	18	0	14	8	0	0	0	0	0	0	3.90435	2.59083	3.00794	0	2.20933	1.6068	0	0	0	0	0	0
7:34353390|34371184	7:34353389|34371184	Lsm14a	1.23512	0.00161604	1	up	yes	0.135401	0	4	6	6	12	24	6	0	0	0	0	0	0	0.704169	0.930438	0.963944	2.12415	3.99694	0.998635	0	0	0	0	0	0
8:41199652|41200604	8:41199651|41200604	Fgl1	-2.30472	2.2e-05	0.0674454	down	yes	0	0.394072	0	0	0	0	0	0	42	0	26	20	46	14	0	0	0	0	0	0	7.65241	0	4.69915	3.8245	7.1262	3.84073
18:70580653|70594399	18:70580652|70594399	Mbd2	-2.18829	0.000421459	0.483782	down	yes	0	0.355763	0	0	0	0	0	0	32	0	38	26	44	0	0	0	0	0	0	0	5.05224	0	6.93976	4.41781	6.78291	0
2:59932105|59936751	2:59932104|59936751	Baz2b	-1.85075	0.00152675	1	down	yes	0	0.260689	0	0	0	0	0	0	44	14	24	0	26	0	0	0	0	0	0	0	7.3408	2.52407	4.11317	0	4.05408	0
4:149202508|149206773	4:149202507|149206773	Kif1b	-1.50348	0.0021643	1	down	yes	0	0.183526	0	0	0	0	0	0	10	0	16	24	6	16	0	0	0	0	0	0	1.57285	0	2.76992	4.71211	1.02447	2.95346
10:80000712|80001090	10:80000711|80001090	Abca7	-1.13328	0.00489233	1	down	yes	0	0.119356	0	0	0	0	0	0	12	26	0	4	12	4	0	0	0	0	0	0	1.89695	4.69334	0	0.66404	1.75415	0.75311
5:23482402|23486400	5:23482401|23486400	Kmt2e	-1.39773	0.00586485	1	down	yes	0	0.163487	0	0	0	0	0	0	6	38	0	0	14	14	0	0	0	0	0	0	0.950084	6.9725	0	0	2.49642	3.82909
18:35613323|35613502	18:35613322|35613502	Paip2	-1.0151	0.00641085	1	down	yes	0.269381	0.646536	10	22	10	18	20	22	26	42	56	50	36	42	1.96545	3.44817	1.76586	3.51594	3.84909	4.18409	4.52675	8.85375	9.98341	10.3272	6.01015	8.09477
5:35836948|35841401	5:35836947|35841401	Ablim2	-1.4668	0.00824993	1	down	yes	0	0.176408	0	0	0	0	0	0	0	20	18	22	10	0	0	0	0	0	0	0	0	3.92022	3.60505	3.65554	1.61114	0
5:90470791|90472074	5:90470790|90472074	Alb	-1.50011	0.0108073	1	down	yes	0	0.182865	0	0	0	0	0	0	26	0	30	8	0	6	0	0	0	0	0	0	4.46855	0	5.31863	1.44404	0	1.08422
mmu-circRNA1234	14:72589753|72599142	Fndc3a	-1.38417	0.0141254	1	down	yes	0	0.161022	0	0	0	0	0	0	6	0	16	24	0	14	0	0	0	0	0	0	0.943708	0	3.11496	4.85029	0	2.47833
circRNA, circular RNA; mmu, Mus musculus; "mmu-circRNA*" represents annotated in the circBase or circ2Trait database with a specific circRNA ID number.
